# Glutathione-S-transferase from the arsenic hyperaccumulator fern *Pteris vittata* can confer increased arsenate resistance in *Escherichia coli*

Aftab A. Khan<sup>1,4</sup>, Danielle R. Ellis<sup>2,5</sup>, Xinyuan Huang<sup>2,6</sup>, Gareth J. Norton<sup>3</sup>, Andrew A. Meharg<sup>3,7</sup>, David E. Salt<sup>2,8</sup>, and Laszlo N. Csonka<sup>1\*</sup>

Address: **1**Department of Biological Sciences, Purdue University, West Lafayette IN 47907 United States of America, **2**Departement of Horticulture and Landscape Architecture, Purdue University, West Lafayette IN 47907 United States of America, **3**Institute of Biological and Environmental Sciences, University of Aberdeen, Aberdeen, AB24 3UU, United Kingdom; Current addresses: **4**Laboratory of Renewable Resources Engineering, Purdue University, West Lafayette IN 47907 United States of America, **5**Biology Department, West Virginia University, Morgantown WV 26506-6057, **6**College of Resources and Environmental Sciences, Nanjing Agricultural University, Nanjing 210095 China, **7**School of Biological Sciences, Queen's University Belfast, Belfast, BT7 1NN, Northern Ireland, United Kingdom, **8**Division of Plant and Crop Sciences, School of Biosciences, University of Nottingham, Sutton Bonington Campus, Sutton Bonington, LE12 5RD, United Kingdom

**Short title:** GSTs from arsenate hyperaccumulator *P. vittata*

\*Corresponding author

email addresses of corresponding author Laszlo N. Csonka [csonka@purdue.edu](mailto:csonka@purdue.edu)

1

2 **Abstract**

1 Although arsenic is generally a toxic compound, there are a number of ferns in the genus *Pteris*  
2 that can tolerate large concentrations of this metalloid. In order to probe the mechanisms of arsenic  
3 hyperaccumulation, we expressed a *Pteris vittata* cDNA library in an *Escherichia coli*  $\Delta arsC$   
4 (arsenate reductase) mutant. We obtained three independent clones that conferred increased  
5 arsenate resistance on this host. DNA sequence analysis indicated that these clones specify  
6 proteins that have a high sequence similarity to the phi class of glutathione-S-transferases (GSTs)  
7 of higher plants. Detoxification of arsenate by the *P. vittata* GSTs in *E. coli* was abrogated by a  
8 *gshA* mutation, which blocks the synthesis of glutathione, and by a *gor* mutation, which inactivates  
9 glutathione reductase. Direct measurements of the speciation of arsenic in culture media of the *E.*  
10 *coli* strains expressing the *P. vittata* GSTs indicated that these proteins facilitate the reduction of  
11 arsenate. Our observations suggest that the detoxification of arsenate by the *P. vittata* GSTs  
12 involves reduction of As(V) to As(III) by glutathione or a related sulfhydro compound.

13 **Funding:** The authors acknowledge support from the Indiana 21st Century Research and  
14 technology Fund (912010479) to DES and LNC, from the U.S. Department of Energy (grant no.  
15 DE-FG02-03ER63622) to DES, and from BBSRC-DFID (grant no. BBF0041841GJN) to AAM.  
16 The funders had no role in study design, data collection and analysis, decision to publish, or  
17 preparation of the manuscript. There are no financial, personal, or professional interests that could  
18 be construed to have influenced the paper.

19

## 1 **Introduction**

2       Several members of the fern genus *Pteris* can accumulate high levels of arsenic [1,2]. The first  
3 arsenic hyperaccumulator discovered was *Pteris vittata* (Chinese brake fern), which can contain  
4 arsenic at levels in excess of 20 mg/g in its fronds [1,3]. Such high level accumulation, and hence,  
5 tolerance of arsenic is remarkable in view of the toxicity of this element [4]. The exceptionally  
6 high arsenic tolerance of the hyperaccumulating ferns not only makes them good candidates for  
7 use in biological remediation of arsenic-contaminated environments, but it also makes them  
8 interesting systems to unravel the basic mechanisms of resistance to this widespread environmental  
9 pollutant.

10       Paradoxically, detoxification of arsenate involves reduction to arsenite [5,6], which has  
11 potentially higher human and ecological toxicity than arsenate [7,8]. Arsenite produced from  
12 arsenate is known to be removed from the cytoplasm by various efflux mechanisms. In  
13 *Escherichia coli*, it is pumped out by an ATP-dependent export system, and in yeast it is eliminated  
14 by a combination of efflux into the medium by a plasma membrane-bound carrier and transfer into  
15 the vacuole as a glutathione adduct [5,6]. In *Arabidopsis thaliana*, an arsenic sensitive non-  
16 hyperaccumulating plant, arsenite is transferred to the vacuole, as a phytochelatin adduct via two  
17 paralogous ABCC-type transporters (*AtABCC1* and *AtABCC2*) [9]. Three different families of  
18 arsenate reductases have been identified, represented by the ArsC protein of *E. coli* [10], the ArsC  
19 protein of *Staphylococcus aureus* [11], and the Acr2 protein of yeast [12]. The *E. coli* and yeast  
20 arsenate reductases use reduced glutathione (GSH) as the direct electron donor for the reduction  
21 of arsenate, whereas the *S. aureus* enzyme employs thioredoxin. Ellis et al. [13] cloned the *P.*  
22 *vittata* *PvACR2* arsenate reductase gene from a cDNA library of arsenate-treated gametophytes.  
23 This enzyme shows 25% amino acid sequence identity / 47% similarity to the yeast ACR2 protein  
24 and likewise uses GSH as substrate. Like the yeast enzyme, the *P. vittata* ACR2 lacks phosphatase  
25 activity [13]. Arsenate reductase has been shown to be induced 7-fold by arsenate in the roots of  
26 *P. vittata* [14]. The reduction product of arsenate is accumulated as free arsenite in the fronds of

1 this fern probably in the vacuoles [3,13,15]. Arsenate reductases similar to the *P. vittata* ACR2  
2 protein have been cloned from rice [16] and the arsenate-tolerant grass *Holcus lanatus* [4], and  
3 orthologous sequences have been identified in the genomes of other plants and fungi that are not  
4 arsenic hyperaccumulators [16], though all these enzymes also have phosphatase activity.

5 Phytochelatins are cysteine-rich peptides derived from GSH that can bind to arsenite and  
6 several reactive heavy metal cations [17]. *A. thaliana* mutants unable to synthesize phytochelatins  
7 show enhanced sensitivity to arsenic [18], and overproduction of these compounds has been shown  
8 to increase arsenate resistance [4,19,20]. Phytochelatins have been detected in *P. vittata* and in  
9 the related species *Pteris cretica*, but unlike in non-hyperaccumulator plants, only a small portion  
10 of arsenic is complexed with phytochelatins in these hyperaccumulators. Phytochelatin production  
11 in these arsenic hyperaccumulators is limited [17,21], suggesting that arsenic-phytochelatin  
12 complexes do not form a major storage form for arsenic, although they still may play an important  
13 role in hyperaccumulation, as indicated by the occurrence of highly localized thiolate-coordination  
14 of arsenic in close proximity to the vein and mid-veins in the fronds of the *P. vittata* sporophyte  
15 [17,21].

16 Two other proteins that could play a role in arsenic tolerance or hyperaccumulation in *P. vittata*  
17 have been identified by selection for clones from cDNA libraries that increased the arsenate  
18 tolerance of an arsenate reductase mutant ( $\Delta arsC$ ) of *E. coli*. One gene obtained by this approach  
19 was found to specify a triosephosphate isomerase [22]. In addition to its expected enzymatic  
20 activity, it was suggested that this enzyme promotes the reduction of arsenate by an unknown  
21 mechanism. The second enzyme that was identified in this manner was a glutaredoxin [23], which  
22 was able to confer increased resistance to both arsenate and arsenite by a mechanism that needs to  
23 be determined.

24 In order to identify other proteins that could contribute to the arsenic resistance of *P. vittata*,  
25 we carried out a similar procedure to isolate clones from a *P. vittata* cDNA library that elevated  
26 the arsenate resistance of a  $\Delta arsC$  mutant *E. coli*. Nucleotide sequence analysis revealed that the

1 cDNA clones in these derivatives encode proteins that have high sequence similarity to  
2 glutathione-S-transferases (GSTs).

### 3 **Materials and Methods**

#### 4 **Bacterial Strains and Growth Conditions**

5 The *E. coli* K12 strain W3110 (IN[*rrnD-rrnE*]) and its arsenate reductase mutant derivative  
6 WC3110 ( $\Delta$ *ArsC* IN[*rrnD-rrnE*]) [12] were obtained from B. Rosen (Wayne State University), the  
7  $\gamma$ -glutamyl-cysteine synthetase mutant JTG10 (*gshA20::Tn10kan thr-1 araC14 leuB6*[Am]  $\Delta$ (*gpt-*  
8 *proA*)62 *lacY1 tsx-33 glnV44 galK2 hisG4 rfbC1 mgl-5 kdgK51 xylA5 mtl-1 argE3 thi-1  $\lambda$  rpsL31*)  
9 [24] was obtained from the *E. coli* Genetic Stock Center, and the glutathione reductase mutant  
10 BW31342 ( $\Delta$ *gor::cat*) and the arsenate reductase mutant BW39212 ( $\Delta$ *ArsC::kan*) were obtained  
11 from B. Wanner (Purdue University). The arsenate reductase-glutathione synthetase double  
12 mutant strain KC1680 was constructed by P1 transduction of the *gshA20::Tn10kan* from strain  
13 JTG10 into WC3110. The arsenate reductase-glutathione reductase double mutant strain KC1852  
14 was constructed by transduction of the  $\Delta$ *ArsC::kan* and  $\Delta$ *gor::cat* insertions elements BW31342  
15 and BW39212 into WC3110. Strains KC1858 ( $\Delta$ *gor::cat*  $\Delta$ *ArsC::kan* IN[*rrnD-rrnE*] /  
16 pTriplEx2), KC1860 ( $\Delta$ *ArsC::kan*  $\Delta$ *gor::cat* IN[*rrnD-rrnE*] / pPvGST35), and KC1862  
17 ( $\Delta$ *ArsC::kan*  $\Delta$ *gor::cat* IN[*rrnD-rrnE*] / pPvGST41) were made by electroporating the indicated  
18 plasmids into KC1852.

19 Bacterial cultures were grown with aeration at 37° in the rich medium LB [25] or K medium,  
20 which has a phosphate concentration of 1 mM [26]. When used, ampicillin (Ap), chloramphenicol  
21 (Cm), and kanamycin sulfate (Km) were at 100, 25, and 75 mg l<sup>-1</sup>, respectively. Solid media  
22 contained 20 g l<sup>-1</sup> Difco agar. Na<sub>2</sub>AsO<sub>4</sub>·7H<sub>2</sub>O and NaAsO<sub>2</sub> were purchased from J. T. Baker and  
23 Sigma, respectively.

24 Arsenate resistance was assessed qualitatively on solid media by the radial streaking method  
25 [27]: Whatman GF/A filter disks (21 mm diameter) were placed in the middle of K medium plates

1 containing 1 mM isopropyl- $\beta$ -D-thiogalactopyranoside (IPTG; added to induce the expression of  
2 the cDNA genes from the *lac* promoter on the cloning vector), and 30  $\mu$ l of 2 M Na<sub>2</sub>HAsO<sub>4</sub>  
3 solution was placed on the disks and air-dried. Strains were streaked with sterile toothpicks  
4 outward from the disk, and their As<sup>R</sup> was evaluated by the size of the zone of growth-inhibition  
5 next to the arsenate-containing filter disk compared to that seen with WC3110 ( $\Delta$ *arsC*) carrying  
6 the empty cloning vector pTriplEx2. For a more quantitative determination of arsenate and  
7 arsenite resistance in liquid culture, we used the procedure of Mukhopadhyay et al. [12] with slight  
8 modifications: Cultures of strains carrying the *P. vittata* GST clones were grown overnight in LB  
9 + Ap and were subcultured at 1:100 dilution into K medium + 1 mM IPTG, plus different  
10 concentrations of Na<sub>2</sub>HAsO<sub>4</sub> or NaAsO<sub>2</sub> and grown with aeration. After 24.0 h of incubation at  
11 37°, the cell density of the cultures was measured as light scattering in a Shimadzu UV-1700  
12 spectrophotometer at 600 nm (OD<sub>600</sub>), with appropriate dilutions to correct for multiple scattering  
13 at OD<sub>600</sub>  $\geq$  1.0 (where OD<sub>600</sub> = 1 corresponds to  $\sim 1.5 \times 10^9$  cells/ml). For each arsenate or arsenite  
14 concentration tested, the measurements were performed with three independent cultures.

## 15 *Pteris vittata* cDNA library construction and screening

16 RNA was purified from *P. vittata* gametophytes grown for 6 weeks in liquid culture [28]  
17 containing 1 mM KH<sub>2</sub>AsO<sub>4</sub>. A cDNA library was synthesized using BD Biosciences Clontech  
18 SMART<sup>®</sup> cDNA library Construction kit (User Manual PT3000-1 [PR15738]) and cloned between  
19 the SfiIA and SfiIB sites of plasmid pTriplEx2 (Clontech). The ligation mixture was  
20 electroporated into *E. coli* strain DH10B [29] and transformants selected on LB Ap plates. Plasmid  
21 DNA was isolated from a pool of  $\sim 7 \times 10^6$  colonies and electroporated into WC3110 ( $\Delta$ *arsC*). The  
22 cells were allowed to recover in 1 ml LB medium for one hour at 37°C with aeration. Aliquots of  
23 100  $\mu$ l of the transformation mixtures were inoculated on K medium plates containing 6mM  
24 Na<sub>2</sub>AsO<sub>4</sub>·7H<sub>2</sub>O and 1 mM IPTG. After two days, the plates were examined for the appearance of  
25 As<sup>R</sup> colonies. Spontaneous As<sup>R</sup> mutants arose in the untransformed control cells at a frequency of  
26  $\sim 2$  per  $10^7$  cells; the frequency of such derivatives was generally 2- to 10-fold higher in the cultures

1 transformed with the library. For plates that contained fewer than ~50 As<sup>R</sup> transformed colonies,  
2 the strains were single colony isolated on K medium plates containing 6 mM Na<sub>2</sub>AsO<sub>4</sub>•7H<sub>2</sub>O, and  
3 then tested for Ap resistance (Ap<sup>R</sup>) on LB plates, confirming the presence of the cloning vector (as  
4 opposed to a spontaneous mutation to As<sup>R</sup> by the host). Plates that contained more than 50 As<sup>R</sup>  
5 colonies were replica-plated to LB Ap plates, and colonies that were stably Ap<sup>R</sup> were single colony  
6 isolated on K medium plates containing 6 mM arsenate. Plasmids were isolated from the  
7 transformants that were confirmed to be both As<sup>R</sup> and Ap<sup>R</sup> and were retransformed into WC3110,  
8 selecting Ap<sup>R</sup>. The derivatives obtained in the latter step were tested for As<sup>R</sup> by radial streaking.  
9 Plasmids were isolated from the As<sup>R</sup> strains and the sequences of the cDNA inserts were  
10 determined at Purdue Genomics Core Facility. The sequences were analyzed with the blastn and  
11 blastp algorithms (<http://blast.ncbi.nlm.nih.gov/Blast.cgi>). The sequences of the three *P. vittata*  
12 ST cDNA clones pPvGST35, pPvGST41, and pPvGST57 that we obtained were entered into  
13 GenBank under accessions numbers EU259318, EU259319, and EU259320, respectively.

#### 14 Speciation of arsenic in cell cultures.

15 Strains KC1749 (pTriplEx2), KC1761 (pPvGST35) and KC1763 (pPGSTv41) were grown LB  
16 + Ap, 0.03 ml were inoculated into 3 ml of K medium containing 10 mM glucose + 0.1 mM  
17 Na<sub>2</sub>HAsO<sub>4</sub> + Ap + 1 mM IPTG and incubated with aeration for 24 h. At the end of the growth,  
18 the cell density was determined by light scattering at 600 nm (OD<sub>600</sub>). The cells from 1.5 ml  
19 samples were sedimented by a microfuge, 0.5 ml of the supernatant culture media were mixed with  
20 0.5 ml of a buffer containing 13.36 mM NH<sub>4</sub>NO<sub>3</sub>, 13.36 mM NH<sub>4</sub>H<sub>2</sub>PO<sub>4</sub>, and 10 mM EDTA (pH  
21 6.2) and flash-frozen in dry ice ethanol. EDTA was used in the extraction buffer as it has been  
22 shown to preserve the inorganic arsenic species [30]. The As(III) and As(V) content of the samples  
23 from 5 independent cultures for each strain were determined as described by the method of  
24 Williams et al. [31].

## 25 Results

## 1 Isolation of cDNA clones from *P. vittata* that confer arsenate-resistance in *E. coli*

2 Plasmids *pPvGST35*, *pPvGST41*, and *pPvGST57* were isolated by introducing a *P. vittata*  
3 cDNA expression library into the  $\Delta arsC$  (arsenate reductase) mutant *E. coli* WC3110 and selecting  
4 derivatives that could grow in K medium containing 6 mM  $Na_2AsO_4$ . The arsenate resistance  
5 ( $As^R$ ) phenotype of these transformants is illustrated in Figure 1: The three plasmids carrying the  
6 *P. vittata* cDNA clones conferred increased  $As^R$  on this host strain compared to the control carrying  
7 the empty vector pTriplex2. The phenotype conferred by these three plasmids was evaluated in a  
8 more quantitative form in Figure 2, which shows that in liquid medium, the plasmids conferred  
9 very similar increases in  $As^R$  above that seen with the control strain carrying the empty cloning  
10 vector. WC3110 derivatives expressing the *P. vittata* GST clones had an exponential doubling  
11 time of 1.6 h in K medium +10 mM  $Na_2AsO_4$ , whereas the empty vector control had a doubling  
12 time of >12 h (data not shown).

## 13 The cDNA clones conferring arsenate resistance encode GST-family proteins

14 DNA sequence analysis revealed that the three plasmids conferring  $As^R$  contain a 217-codon  
15 open reading frame whose deduced protein product shows high similarity to GSTs from higher  
16 plants. Plasmids *pPvGST35* and *pPvGST57* are identical in their nucleotide sequences in the  
17 central protein-coding region (Figure 3); the gene contained in these two plasmids was designated  
18 *PVGST1*. These two plasmids exhibited slight sequence differences at the 5' and 3' ends of the  
19 inserts, which could have been due to the fact that they were from different mRNAs, or differences  
20 could have been introduced during cloning. In any case, the fact that the plasmids are different  
21 indicates that they are independent isolates. The insert in *pPGSTv41* shows a 13% nucleotide  
22 sequence difference from the inserts in *pPvGST35* and *pPvGST57*, resulting in 23-amino acid  
23 difference in the predicted open reading frames (Figure 3). Consequently, the open reading frame  
24 in *pPvGST41*, which is designated *PVGST2*, specifies a GST that is different from *PVGST1*. The  
25 expression vector pTriplex2 contains translation start signals for 5' portions of the *ompA* and *lacZ*  
26 genes in different reading frames, followed by a run of T residues that provide a site for



1 transcriptional frameshifting. Consequently, cloned inserts may be translated in all three reading  
2 frames as N-terminal fusion proteins with OmpA or LacZ peptides. DNA sequencing revealed  
3 that the inserts in *pPvGST35* and *pPvGST57* contain a TAG termination codon 24 bases upstream  
4 of the ATG initiation codon for the GST, indicating that these two gene products are not made as  
5 fusion proteins. However, there is no analogous in-frame termination codon upstream of the GST  
6 sequence in *pPvGST41*, and so the latter may be translated as a fusion product with an N-terminal  
7 peptide from LacZ or OpmA.

8 GSTs of higher plants have been assigned into four classes based on their amino acid  
9 sequences: phi, tau, theta, and zeta; representatives of the former two classes are also found in  
10 bacteria and members of the latter two classes are also present in animals [32]. Figure 4A shows  
11 a multiple alignment of the two *P. vittata* genes against four of the most closely related enzymes  
12 from other plant species and one representative of each of the four classes of GSTs from *A.*  
13 *thaliana*. This analysis indicates that the *P. vittata* enzymes cluster together and with other  
14 members of the phi-class of plant GSTs (Figure 4B). One of the diagnostic features of the phi  
15 class of GSTs is that their GSH-binding site contains the amino acid triplet ESR [32], which is  
16 present in the *P. vittata* clones (Figure 4A).

17 The *P. vittata* GSTs do not show significant similarity (blastp Expect value > 0.019) to the  
18 three types of arsenate reductases represented by the *E. coli*, *S. aureus*, and the yeast/*P. vittata*  
19 enzymes. Genes encoding highly similar phi class GST can be found in the *Myxococcales* bacteria  
20 *Sorangium cellulosum* ‘So ce 56’ and *Myxococcus xanthus* DK 1622 (blastp similarity to *PV GST1*  
21 Expect value = 5e-43 and 6e-28, respectively) and in over 100 other bacteria with blastp Expect  
22 values between 1e-18 and 1e-13. The function of these bacterial enzymes has not yet been  
23 determined.

## 24 Nucleotide sequence features of the *P. vittata* GST clones

25 An interesting feature of the three *P. vittata* GST clones is that they contain 10 repeats of the  
26 dinucleotide GA immediately upstream and overlapping the ATG start (Figure 3). This motif is

1 not present in the most closely related plant GSTs genes, including the one from the moss  
2 *Physcomitrella patens*. However, a cDNA glutaredoxin clone from *P. vittata* [23] also contains  
3 12 GA repeats seven nucleotides upstream of the translation start site (see sequence under  
4 GenBank accession number EF052272). Whether these repeats are associated with the expression  
5 of arsenic tolerance-related genes in *P. vittata* or whether they have some other function in gene  
6 expression in this fern remains to be explored. There are precedents for strings of GA repeats  
7 upstream of genes in other eukaryotic systems. In *Drosophila melanogaster*, the so-called GAGA  
8 elements have been recognized as the binding sites of a chromatin remodeling factor that increases  
9 transcription from the *hsp70* promoter [33 and references therein]. A GAGA element has been  
10 found between the TATA box and the transcription start sites of the *Gsa1* gene of *Glycine max*,  
11 which has been suggested to be involved in the transcriptional control of the gene. Repeats of GA,  
12 or its complement CT, have also been found downstream of viral promoters, and it has been  
13 suggested that they play a positive role in transcriptional activation [34,35].

#### 14 Phenotypic characterization of the *P. vittata* GST clones in *E. coli*

15 We tested whether the *P. vittata* GST clones can confer increased As<sup>R</sup> in an arsenate reductase  
16 proficient (*arsC*<sup>+</sup>) host (Figure 5). Our results reproduce the finding of Mukhopadhyay et al. [12]  
17 that loss of the *E. coli* arsenate reductase greatly increases sensitivity to arsenate (compare  
18 *arsC*<sup>+</sup>/empty vector with  $\Delta$ *arsC*/empty vector). Although the *P. vittata* clones substantially elevate  
19 As<sup>R</sup> in the  $\Delta$ *arsC* mutant, they resulted only in a marginal, statistically insignificant increase in the  
20 already high As<sup>R</sup> of the *arsC*<sup>+</sup> strain. These results indicate that although the *P. vittata* GSTs can  
21 functionally substitute for the *E. coli* arsenate reductase in the  $\Delta$ *arsC* mutant, they do not provide  
22 improved resistance against this toxic chemical above the level conferred by the endogenous  
23 enzyme.

24 The sequence similarity of our clones to known GSTs suggests that the *P. vittata* enzymes  
25 probably use glutathione as a substrate. To test this, we determined whether blocking glutathione  
26 synthesis with a *gshA* ( $\gamma$ -glutamyl-cysteine synthetase) mutation would diminish the arsenate

1 resistance conferred by these plasmids. The *gshA*  $\Delta$ *arsC* double mutant carrying the empty cloning  
2 vector was considerably more sensitive to arsenate in the absence of GSH than the  $\Delta$ *arsC* *gshA*<sup>+</sup>  
3 counterpart (Figure 6A). More importantly, the *gshA* mutation cancelled the ability of the *P. vittata*  
4 clones to confer arsenate resistance in the absence of glutathione. Supplementation with GSH,  
5 which can be taken up by *E. coli* [36], restored the ability of the clones to confer As<sup>R</sup> in the *gshA*  
6 mutant background (Figure 6B). These results suggest that the *P. vittata* GSTs use GSH as  
7 substrate for the detoxification of arsenate.

8 Finally, we examined whether the *P. vittata* GSTs could confer resistance to arsenite and found  
9 that that the clones were unable to do so either in the  $\Delta$ *arsC* mutant (Figure 7) or in the *arsC*<sup>+</sup>  
10 background (data not shown), indicating that the *P. vittata* GSTs can detoxify arsenate but not  
11 arsenite.

12 We carried out GST activity assays of the *E. coli* strains carrying the *P. vittata* clones using 1-  
13 chloro-2,4-dinitrobenzene (CDNB) as substrate, which has been used to assay phi class GSTs from  
14 plants [32,37]. However, we were not able to detect statistically significant GST activity in the *E.*  
15 *coli* strains carrying the *P. vittata* clones (data not shown), indicating that the *P. vittata* GSTs are  
16 unusual among the phi class enzymes in that they have no detectable activity with CDNB as  
17 substrate.

18

## 1 The *P. vittata* GSTs promote the reduction of arsenate in *E. coli*

2 In order to probe the mechanism by which the *P. vittata* GST clones confer increased arsenate  
3 resistance, we carried out two experiments to determine whether this phenotype involves the  
4 reduction of this toxic compound. In one of these experiments, we tested the effect of a glutathione  
5 reductase (*gor*) mutation on the ability of the *P. vittata* GSTs to impart increased arsenate  
6 resistance. The result was that the ability of the GST plasmids *pPvGST35* and *pPvGST41* to confer  
7 increased arsenate resistance was compromised by the  $\Delta$ *gor::cat* mutation (Figure 8). This result  
8 suggests that arsenate detoxification involves the oxidation of GSH, and glutathione reductase is  
9 required to regenerate this reduced sulfhydro compound.

10 We also tested whether the *P. vittata* GSTs increases the formation of As(III) from arsenate.  
11 For this experiment, we grew derivatives of strain WC3110 ( $\Delta$ *arsC*) carrying the empty cloning  
12 vector or plasmids *pPvGST35* and *pPvGST41* in medium containing an initial 1 mM Na<sub>2</sub>HAsO<sub>4</sub>,  
13 and after 24 h of growth, we quantified the proportions of arsenic as As(III) and As(V) in the  
14 culture medium. The final biomass density of the cultures was OD<sub>600</sub> = 0.96 ± 0.05 for the strain  
15 carrying the empty cloning vector, and OD<sub>600</sub> = 1.71 ± 0.10 and 1.82 ± 0.15 for the strains carrying  
16 *pPvGST35* and *pPvGST41*, respectively, confirming the ability of the GST plasmids to confer  
17 increased arsenate resistance. The cells were sedimented by centrifugation, and the amounts of  
18 arsenic in the medium as As(III) and As(V) were determined as described in Materials and  
19 Methods. The results are shown in Table 1. For strain KC1749, which carried the empty cloning  
20 vector, approximately 30% of the input arsenic was converted to As(III), with the balance  
21 remaining as As(V). It is not clear whether the reduction of arsenate in this culture was due to an  
22 enzymatic process or to some spontaneous reaction with GSH or some other sulfhydro compound.  
23 However, in the cultures of the strains carrying *pPvGST35* and *pPvGST41*, the proportion of  
24 arsenic that was recovered as As(III) increased to approximately 60% and 69%. This result  
25 indicates that the *P. vittata* GSTs promoted the formation of an As(III) species, suggesting that the  
26 increased arsenate resistance conferred by these enzymes involves the reduction of arsenate.

## 1 Discussion

2 In this work, we isolated three independent clones from a *P. vittata* cDNA library that imparted  
3 increased arsenate resistance to an *arsC* mutant *E. coli*. Sequence analysis indicated that these  
4 clones encode proteins that have high sequence similarity to the phi family of higher plant GSTs.  
5 GSTs have diverse functions related to the detoxification of harmful substances [32]. Some have  
6 glutathione dependent peroxidase or isomerase activities [38,39]. Others are involved in  
7 detoxification of xenobiotics by glutathione conjugation. It has been suggested that some GSTs  
8 function as ligands or carrier proteins for a variety of molecules [40]. They have also been  
9 implicated in signal transduction pathways [41] and in responses to a wide range of stresses [32].

10 Our phenotypic analysis in a  $\Delta$ *arsC* mutant *E. coli* indicated that the *P. vittata* GSTs require  
11 GSH for arsenate resistance. The *ArsC*, *Acr2p*, and *PvACR2* arsenate reductases of *E. coli*, yeast,  
12 and *P. vittata* use GSH as electron donor and produce oxidized glutathione (GSSG) [12,13,42].  
13 Arsenate reduction in *E. coli* and yeast requires the participation of a glutaredoxin, which  
14 regenerates GSH from GSSG. However, the human monomethylarsonic acid reductase, which is  
15 a member of the omega family of mammalian GSTs [43], can carry out the GSH-dependent  
16 reduction of methylarsonate to methylarsenite without the direct involvement of a glutaredoxin  
17 [44]. It is possible that the *P. vittata* GSTs may be able to catalyze the analogous reduction of  
18 arsenate to arsenite.

19 Another type of mammalian GSTs, which belong to the omega subfamily, can detoxify arsenite  
20 by forming an arsenite-(GSH)<sub>3</sub> complex that is excreted from the cells [45,46]. Our observation  
21 that the *P. vittata* GSTs do not provide increased resistance to arsenite suggests that they do not  
22 operate by this mechanism. It is possible that the *P. vittata* GSTs might facilitate the formation of  
23 an arsenate-GSH adduct that could be expelled from *E. coli*. However, the latter mechanism would  
24 necessitate the stoichiometric consumption of at least one molecule of GSH for one molecule of  
25 arsenate that is detoxified. In view of the fact that our GST cDNA clones could provide resistance  
26 to at least 10 mM arsenate in a medium that contains only 10 mM glucose as carbon source, we

1 feel that this mechanism is unlikely. The requirement for glutathione reductase also supports the  
2 conclusion that GSH has a catalytic rather than a stoichiometric role.

3 Arsenate resistance in the hyperaccumulator *P. vittata* is thought to involve reduction of As(V)  
4 to As(III) and transport into the vacuoles in fronds and gametophytes. An arsenate reductase has  
5 been cloned from *P. vittata* [13], and it has been recently reported that a triosephosphate isomerase  
6 [22] and glutaredoxin [23] from this organism can increase the arsenic resistance in *E. coli*. Our  
7 observations that the *P. vittata* GSTs promote the GSH-dependent conversion of As(V) to As(III)  
8 in the *arsC* mutant *E. coli* suggest that these proteins participate in an arsenate reduction pathway,  
9 which also involves the bacterial glutathione reductase. However, we do not have any direct  
10 evidence that the *P. vittata* GSTs by themselves have arsenate reductase activity and cannot rule  
11 out other possible mechanisms, such as that these enzymes might detoxify arsenate by promoting  
12 the formation of a GSH complex. It will be necessary to purify these enzymes from *E. coli* and  
13 establish whether they have one of the above enzymatic activities in vitro. Finally, although the  
14 fact that the GSTs conferred increased arsenate tolerance in *E. coli* makes it attractive to  
15 hypothesize that these proteins are likely to contribute to the arsenic tolerance or  
16 hyperaccumulation in *P. vittata*, it will be necessary to confirm the roles of these enzymes in  
17 arsenic metabolism in the ferns.

## 18 **Acknowledgments**

19 We thank A. Murphy for helpful discussions, and N. Csonka for help with the photography and  
20 image processing.

## 21 **Author Contributions**

22 Conceived and guided the project: DES LNC. Isolated *P. Vittata* GST cDNA clones in *E. coli*  
23 and carried out initial phenotypic characterization: AAK. Constructed the *P. vittata* cDNA

1 expression library: DRE. Carried out the arsenic speciation and related data analysis: GJN and  
2 AAM. Performed the GST assays: XH. Wrote the manuscript: LNC. All authors read and  
3 approved the final manuscript.

4

## 1 **References**

- 2 1. Ma LQ, Komar KM, Tu C, Zhang WH, Cai Y, et al. (2001) A fern that hyperaccumulates  
3 arsenic: a hardy, versatile, fast-growing plant helps to remove arsenic from contaminated soils.  
4 Nature 409: 579.
- 5 2. Visoottiviseth P, Francesconi K, Sridokchan W (2002) The potential of Thai indigenous plant  
6 species for the phytoremediation of arsenic contaminated land. Environ Pollut 118: 453-461.
- 7 3. Wang J, Zhao FJ, Meharg AA, Raab A, Feldmann J, et al. (2002) Mechanisms of arsenic  
8 hyperaccumulation in *Pteris vittata*. Uptake kinetics, interactions with phosphate, and arsenic  
9 speciation. Plant Physiol 130: 1552-1561.
- 10 4. Bleeker PM, Hakvoort HW, Blik M, Souer E, Schat H (2006) Enhanced arsenate reduction  
11 by a CDC25-like tyrosine phosphatase explains increased phytochelatin accumulation in  
12 arsenate-tolerant *Holcus lanatus*. Plant J 45: 917-929.
- 13 5. Rosen BP (2002) Transport and detoxification systems for transition metals, heavy metals and  
14 metalloids in eukaryotic and prokaryotic microbes. Comp Biochem and Physiol A 133: 689-  
15 693.
- 16 6. Vahter M (2002) Mechanisms of arsenic biotransformation. Toxicology 181-182: 211-217.
- 17 7. Bertolero F, Pozzi G, Sabbioni E, Saffiotti U (1987) Cellular uptake and metabolic reduction  
18 of pentavalent to trivalent arsenic as determinants of cytotoxicity and morphological  
19 transformation. Carcinogenesis 8: 803-808.
- 20 8. Carter DE, Aposhian HV, Gandolfi AJ (2003) The metabolism of inorganic arsenic oxides,  
21 gallium arsenide, and arsine: a toxicochemical review. Toxicol Appl Pharm 193: 309-334.
- 22 9. Song WY, Park J, Mendoza-Cózatl DG, Suter-Grotemeyer M, Shim D, et al. (2010) Arsenic  
23 tolerance in *Arabidopsis* is mediated by two ABCC-type phytochelatin transporters. Proc Natl  
24 Acad Sci U S A 107: 21187-21192.
- 25 10. Oden KL, Gladysheva TB, Rosen BP (1994) Arsenate reduction mediated by the plasmid-  
26 encoded ArsC protein is coupled to glutathione. Molec Microbiol 12: 301-306.



- 1 11. Ji G, Silver S (1992) Reduction of arsenate to arsenite by the ArsC protein of the arsenic  
2 resistance operon of *Staphylococcus aureus* plasmid pI258. Proc Natl Acad Sci U S A 89:  
3 9474-9478.
- 4 12. Mukhopadhyay R, Shi J, Rosen BP (2000) Purification and characterization of Acr2p, the  
5 *Saccharomyces cerevisiae* arsenate reductase. J Biol Chem 275: 21149 – 21157.
- 6 13. Ellis DR, Gumaelius L, Indriolo E, Pickering IJ, Banks JA, et al. (2006) A novel arsenate  
7 reductase from the arsenic hyperaccumulating fern *Pteris vittata*. Plant Physiol 141: 1544-  
8 1554.
- 9 14. Duan G-L, Zhu Y-G, Tong Y-P, Cai C, R K (2005) Characterization of arsenate reductase in  
10 the extract of roots and fronds of Chinese brake fern, an arsenic hyperaccumulator. Plant  
11 Physiol 138: 461-469.
- 12 15. Pickering IJ, Gumaelius L, Harris HH, Prince RC, Hirsch G, et al. (2006) Localizing the  
13 biochemical transformations of arsenate in a hyperaccumulating fern. Environ Sci Technol 40:  
14 5010-5014.
- 15 16. Duan G-L, Zhou Y, Tong Y-P, Mukhopadhyay R, Rosen BP, et al. (2007) A CDC25  
16 homologue from rice functions as an arsenate reductase. New Phytol 174: 311-321.
- 17 17. Raab A, Feldmann J, Meharg AA (2004) The nature of arsenic-phytochelatin complexes in  
18 *Holcus lanatus* and *Pteris cretica*. Plant Physiol 134: 1113-1122.
- 19 18. Ha SB, Smith AP, Howden R, Dietrich WM, Bugg S, et al. (1999) Phytochelatin synthase  
20 genes from Arabidopsis and the yeast *Schizosaccharomyces pombe*. Plant Cell 11: 1153-1164.
- 21 19. Li Y, Dankher OP, Carreira L, Smith AP, Meagher RB (2006) The shoot-specific expression  
22 of ©-glutamylcysteine synthetase directs the long-distance transport of thiol-peptides to roots  
23 conferring tolerance to mercury and arsenic. Plant Physiol 141: 288-298.
- 24 20. Li Y, Dhankher OP, L. C, Lee D, Chen A, et al. (2004) Overexpression of phytochelatin  
25 synthase in *Arabidopsis* leads to enhanced arsenic tolerance and cadmium hypersensitivity.  
26 Plant Cell Physiol 45: 1787-1797.

- 1 21. Zhang W, Cai Y, Downum KR, Ma LQ (2004) Thiol synthesis and arsenic hyperaccumulation  
2 in *Pteris vittata* (Chinese brake fern). *Environ Pollut* 131: 337-345.
- 3 22. Rathinasabapathi B, Wu S, Sundaram S, Rivoal J, Srivastava M, et al. (2006) Arsenic  
4 resistance in *Pteris vittata* L.: identification of a cytosolic triosephosphate isomerase based on  
5 cDNA expression cloning in *Escherichia coli*. *Plant Mol Biol* 62: 845-857.
- 6 23. Sundaram S, Rathinasabapathi B, Ma LQ, Rosen BP (2008) An arsenate-activated  
7 glutaredoxin from the arsenic hyperaccumulator fern *Pteris vittata* L. regulates intracellular  
8 arsenite. *J Biol Chem* 283: 6095-6101.
- 9 24. Greenberg JT, Demple B (1986) Glutathione in *Escherichia coli* is dispensable for resistance  
10 to H<sub>2</sub>O<sub>2</sub> and gamma radiation. *J Bacteriol* 168: 1026 – 1029.
- 11 25. Davis RW, Botstein D, Roth JR (1980) *Advanced Bacterial Genetics*. Cold Spring Harbor,  
12 New York: Cold Spring Harbor Laboratory.
- 13 26. Druger-Liotta J, Prange VJ, Overdier DG, Csonka LN (1986) Selection of mutations that alter  
14 the osmotic control of transcription of the *Salmonella typhimurium proU* operon. *J Bacteriol*  
15 169: 2449-2459.
- 16 27. Ratzkin B, Roth J (1978) Cluster of genes controlling proline degradation in *Salmonella*  
17 *typhimurium*. *J Bacteriol* 133: 737-754.
- 18 28. Gumaelius L, Lahner B, Salt DE, Banks JA (2004) Arsenic hyperaccumulation in  
19 gametophytes of *Pteris vittata*: a new model system for analysis of arsenic hyperaccumulation.  
20 *Plant Physiol* 136: 3198- 3208.
- 21 29. Grant SG, Jessee J, Bloom FR, Hanahan D (1990) Differential plasmid rescue from transgenic  
22 mouse DNAs into *Escherichia coli* methylation-restriction mutants. *Proc Natl Acad Sci U S A*  
23 87: 4645-4649.
- 24 30. Bednar AJ, Garbarino JR, Ranville JF, Wildeman TR (2002) Preserving the distribution of  
25 inorganic arsenic species in groundwater and acid mine drainage samples. *Environ Sci Technol*  
26 36: 2213-2218.

- 1 31. Williams PN, Price AH, Raab A, Hossain SA, Feldmann J, et al. (2005) Variation in arsenic  
2 speciation and concentration in paddy rice related to dietary exposure. *Environ Sci Technol*  
3 139: 5531-5540.
- 4 32. Wagner U, Edwards R, P. DD, Mauch F (2002) Probing the diversity of the *Arabidopsis*  
5 glutathione S-transferase gene family. *Plant Molec Biol* 49: 515-532
- 6 33. Wang YV, Tang H, Gilmour DS (2005) Identification in vivo of different rate-limiting steps  
7 associated with transcriptional activators in the presence and absence of a GAGA element.  
8 *Molecand Cell Biol* 25: 3543-3552.
- 9 34. He X, Fütterer J, Hohn T (2002) Contribution of downstream promoter elements to  
10 transcriptional regulation of the rice tungro bacilliform virus promoter. *Nucleic Acids Res* 30:  
11 497-506.
- 12 35. Pauli S, Rothnie HM, Chen G, He X, Hohn T (2004) The cauliflower mosaic virus 35S  
13 promoter extends into the transcribed region. *J Virol* 78: 12120-12128.
- 14 36. Parry J, Clark DP (2002) Identification of a CysB-regulated gene involved in glutathione  
15 transport in *Escherichia coli*. *FEMS Microbiol Lett* 209: 81-85.
- 16 37. Habig WH, Jacoby WB (1981) Assays for differentiation of glutathione-S-transferases. In:  
17 Jacoby WB, editor. *Methods in Enzymology*. New York: Academic Press, Inc. pp. 398-405.
- 18 38. Dixon DP, Cole DJ, Edwards R (2000) Characterisation of a zeta class glutathione transferase  
19 from *Arabidopsis thaliana* with a putative role in tyrosine catabolism. *Arch Biochem Biophys*  
20 384: 407-412.
- 21 39. Nutricati E, Miceli A, Blando F, De Bellis L (2006) Characterization of two *Arabidopsis*  
22 *thaliana* glutathione S-transferases. *Plant Cell Rep* 15: 997-1005.
- 23 40. Mueller LA, Goodman, C.D., Silady RA, Walbot V (2000) AN9, a petunia glutathione-S-  
24 transferase required for anthocyanin sequestration, is a flavonoid-binding protein. *Plant*  
25 *Physiol* 123: 1561-1570.

- 1 41. Chen I-C, Huang I-C, Liu M-J, Wang Z-G, S.-S. C, et al. (2007) Glutathione S-transferase  
2 interacting with far-red insensitive 219 is involved in phytochrome A-mediated signaling in  
3 Arabidopsis. *Plant Physiology* 143: 1189-1202.
- 4 42. Shi J, Vlamis-Gardikas A, Aslund F, Holmgren A, Rosen BP (1999) Reactivity of  
5 glutaredoxins 1, 2, and 3 from *Escherichia coli* shows that glutaredoxin 2 is the primary  
6 hydrogen donor to ArsC-catalyzed arsenate reduction. *J Biol Chem* 274: 36039-36042.
- 7 43. Zakharyan RA, Sampayo-Reyes A, Healy SM, Tsaprailis G, Board PG, et al. (2001) Human  
8 monomethylarsonic acid (MMA<sup>V</sup>) reductase is a member of the glutathione-S-transferase  
9 superfamily. *Chem Res Toxicol* 14: 1051-1057.
- 10 44. Zakharyan RA, Aposhian HV (1999) Enzymatic reduction of arsenic compounds in  
11 mammalian systems: the rate-limiting enzyme of rabbit liver arsenic biotransformation is  
12 MMA<sup>V</sup> reductase. *Chem Res Toxicol* 12: 1278-1283.
- 13 45. Leslie EM, Haimeur A, Waalkes MP (2004) Arsenic transport by the human multidrug  
14 resistance protein 1 (MRP1/ABCC1): Evidence that a tri-glutathione conjugate is required. *J*  
15 *Biol Chem* 279: 32700-32708.
- 16 46. Liu J, Chen H, Miller DS, Saavedra JE, Keefer LK, et al. (2001) Overexpression of glutathione  
17 S-transferase II and multidrug resistance transport proteins is associated with acquired  
18 tolerance to inorganic arsenic. *Mol Pharmacol* 60: 302-309.
- 19 47. Corpet F (1988) Multiple sequence alignment with hierarchical clustering. *Nucleic Acids Res*  
20 16: 10881-10890.

21

## 1 **FIGURE LEGENDS**

2 **Figure 1. Qualitative demonstration of the arsenate resistance conferred by the *P. vittata***  
3 **GST clones in *E. coli*.** Derivatives of strain WC3110 ( $\Delta arsC$ ) carrying the *P. vittata* clones  
4 *PvGST35*, *PvGST41*, and *Pv57* were tested for arsenate resistance on solid media by radial  
5 streaking, as described in Materials and Methods. The filter disk placed on the Petri dish on left  
6 was spotted with 30 of  $\mu\text{l}$   $\text{H}_2\text{O}$  and the one on the right was spotted with 30  $\mu\text{l}$  of 1.8 M  $\text{Na}_2\text{HAsO}_4$ .

7 **Figure 2. Arsenate resistance conferred by the *P. vittata* GST clones on *E. coli* in liquid**  
8 **cultures.** Resistance to the indicated concentrations of  $\text{Na}_2\text{HAsO}_4$  was determined in liquid  
9 cultures, as described in Materials and Methods. Strains used were derivatives of WC3110  
10 ( $\Delta arsC$ ) carrying pTriplEx2 (empty vector), pTriplEx2 containing *P. vittata* GST1 (p*PvGST35* and  
11 p*PvGST57*), or *P. vittata* GST2 (p*PvGST41*). The results are the averages  $\pm$  standard deviation  
12 (indicated by error bars) of data obtained with 3 independent cultures of each strain.

13 **Figure 3. Sequences of the *P. vittata* GST cDNA clones.** The nucleotide and predicted amino  
14 acid sequences of the p*PvGST35*, p*PvGST57*, and p*PvGST41* cDNA clones are shown with lower  
15 case and upper case letters, respectively. Nucleotide sequences that are common to p*PvGST35*  
16 and p*PvGST57* are indicated as "p*PvGST35/57*"; where the two clones differ, the nucleotide  
17 sequences are offset above (for p*PvGST57*) and below (for p*PvGST35*) the common sequences.  
18 The predicted amino acid sequences of *PvGST1* and *PvGST2* are shown by capital letters above  
19 and below the nucleotide sequences for p*PvGST35/57* and p*PvGST41*, respectively. The  
20 nucleotide and amino acid sequences that are common to p*PvGST35* and p*PvGST41* are shown in  
21 **black** letters, and sequences that are different between the two clones are shown in **red**. The GA  
22 repeats before the translation start sites are underlined.

1 **Figure 4. Sequence relationship of the *P. vittata* GSTs with orthologs from other plants.**

2 **Panel A:** Alignment of the amino acid sequences of *PVGST1* and *PVGST2* with the four plant  
3 GSTs that showed the highest similarity to *PVGST1* (blastp Expect values between 1e-60 and  
4 2e-62), and with one representative of each of the four classes of GSTs from *A. thaliana*. Multiple  
5 sequence alignment was performed with the MultAlin algorithm  
6 (<http://multalin.toulouse.inra.fr/multalin>) [47]. The amino acids that are in boxes are conserved in  
7 most GSTs and have been shown to constitute part of the catalytic site, and the amino acids shown  
8 in **bold** letters have been found to be conserved in all *A. thaliana* GSTs [32]. The underlined ESR  
9 sequence is diagnostic of the phi-class of GSTs and constitutes part of the GSH-binding site [32].  
10 The characters "\*", ":", and "." below the comparisons indicate fully conserved, strongly conserved  
11 and weakly conserved residues, respectively, as defined in the instructions for the CLUTALW  
12 algorithm (<http://align.genome.jp/>).

13 The sequences used were [accession numbers in brackets]: *P. patens*, moss *Physcomitrella*  
14 *patens subsp. patens* hypothetical protein GST N family [XP\_001764210.1]; *P. sitchensis*, Sitka  
15 spruce *Picea sitchensis* hypothetical protein GST C family [ABK23015.1]; *C. sinensis*, navel  
16 orange *Citrus sinensis* cultivar Tarocco glutathione S-transferase N family [ABA42223]; *C.*  
17 *argyrophylla*, conifer yin shan *Cathaya argyrophylla* phi class glutathione transferase  
18 [ACL37469.1]; AtGSTF2, *A. thaliana* phi-class glutathione S-transferase F2 [NM\_116486.2];  
19 ATGSTT1, *A. thaliana* theta-class glutathione S-transferase T1 [NM\_123486.3]; AtGSTZ1, *A.*  
20 *thaliana* zeta-class glutathione S-transferase Z1 [NM\_201671.1]; AtGSTU5, *A. thaliana* tau-class  
21 glutathione S-transferase U5 [NM\_128499.3].

22 **Panel B:** The dendrogram was generated from the multiple alignment in Panel with the MultAlin  
23 algorithm.

24 **Figure 5. Arsenate resistance is not enhanced by *P. vittata* GST cDNAs in wild-type *E. coli*.**

25 Resistance was determined in liquid cultures as described in Materials and Methods in the arsenate  
26 reductase proficient (*arsC*<sup>+</sup>) W3110 strain carrying pTriplEx2 (empty vector), pTriplEx2

1 containing *P. vittata* GST1 (pPvGST35), or *P. vittata* GST2 (pPvGST41). Also included are data  
2 for WC3110 ( $\Delta arsC$ ) carrying the empty vector pTriplEx2. The results are the averages  $\pm$  standard  
3 deviation (indicated by error bars) of data obtained with 3 independent cultures of each strain.

4 **Figure 6. Glutathione is required to confer arsenate resistance by the *P. vittata* GST cDNAs.**

5 **Panel A:** Arsenate resistance was determined in a *gshA20*  $\Delta arsC$  double mutant in liquid cultures  
6 in the absence of reduced glutathione, as described in Materials and Methods. The strains carried  
7 pTriplEx2 (empty vector), pPvGST35, and pPvGST41. Also included is a control with strain  
8 WC3110 (*gshA*<sup>+</sup>  $\Delta arsC$ ) carrying pTriplEx2 (empty vector). The results are the averages  $\pm$   
9 standard deviation (indicated by error bars) of data obtained with 3 independent cultures of each  
10 strain. **Panel B:** Arsenate resistance of the *gshA20*  $\Delta arsC$  strains carrying the indicated plasmids  
11 was determined on solid media, as described in the Materials and Methods. The Petri dish on the  
12 left contained K medium and the one on the right contained K medium augmented with 1 mM  
13 GSH, and the filter disks on both plates were spotted with 30  $\mu$ l of 1.8 M Na<sub>2</sub>AsO<sub>4</sub>.

14 **Figure 7. The *P. vittata* GST clones do not increase resistance to arsenite.** Resistance to the  
15 indicated concentrations of NaAsO<sub>2</sub> was determined in liquid cultures, as described in Materials  
16 and Methods. Strains tested were derivatives of WC3110 ( $\Delta arsC$ ) carrying pTriplEx2 (empty  
17 vector), pTriplEx2 containing *P. vittata* GST1 (pPvGST35), or *P. vittata* GST2 (pPvGST41). The  
18 results are the averages  $\pm$  standard deviation (indicated by error bars) of data obtained with 3  
19 independent cultures of each strain.

20 **Figure 8. Glutathione reductase is required for the ability of the *P. vittata* GST clones to**  
21 **confer arsenate resistance.** Resistance to the indicated concentrations of Na<sub>2</sub>HAsO<sub>4</sub> was  
22 determined in liquid cultures, as described in Materials and Methods. Strains tested were  
23 derivatives of KC1852 ( $\Delta arsC::kan$   $\Delta gor::cat$ ) carrying pTriplEx2 (empty vector), pTriplEx2  
24 containing *P. vittata* GST1 (pPvGST35), or *P. vittata* GST2 (pPvGST41). The results are the

- 1 averages  $\pm$  standard deviation (indicated by error bars) of data obtained with 3 independent cultures
- 2 of each strain.
- 3



1 **Table 1.** Conversion of As(V) to As(III) by strains synthesizing the *P. vittata* GSTs

| Strain                              | As(III)<br>( $\mu\text{mol} / \text{ml culture}$ ) | As(V)<br>( $\mu\text{mol} / \text{ml culture}$ ) | As(III)<br>% of total As |
|-------------------------------------|----------------------------------------------------|--------------------------------------------------|--------------------------|
| KC1749<br>(empty vector<br>control) | $0.24 \pm 0.04$                                    | $0.55 \pm 0.09$                                  | $30.3 \pm 0.5$           |
| KC1761<br>(pPvGST35)                | $0.51 \pm 0.08$                                    | $0.35 \pm 0.08$                                  | $59.6 \pm 3.3$           |
| KC1763<br>(pPvGST41)                | $0.57 \pm 0.07$                                    | $0.26 \pm 0.04$                                  | $68.7 \pm 0.7$           |

2  
3 The strains were grown in medium containing  $1.0 \mu\text{mol} / \text{ml Na}_2\text{HAsO}_4$  and the speciation  
4 of arsenic as As(III) and As(V) was determined after 24 h of growth, as described in Materials and  
5 Methods. Results are averages  $\pm$  standard deviation of data obtained with 5 independent cultures  
6 of each strain.

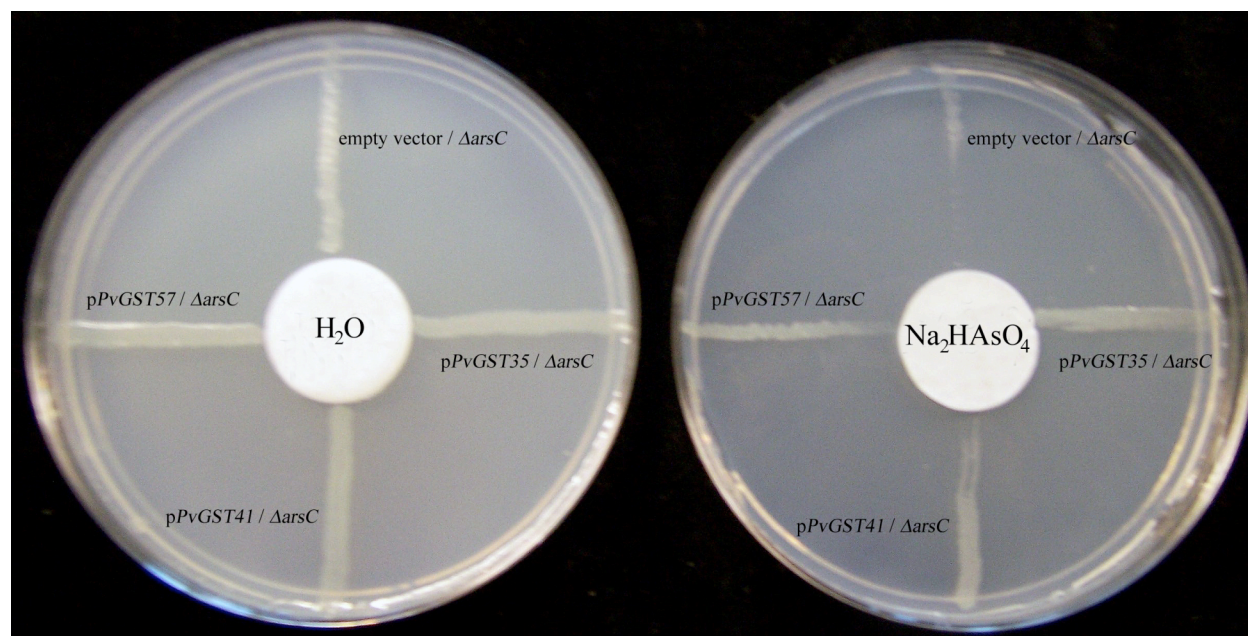

**Figure 1.**

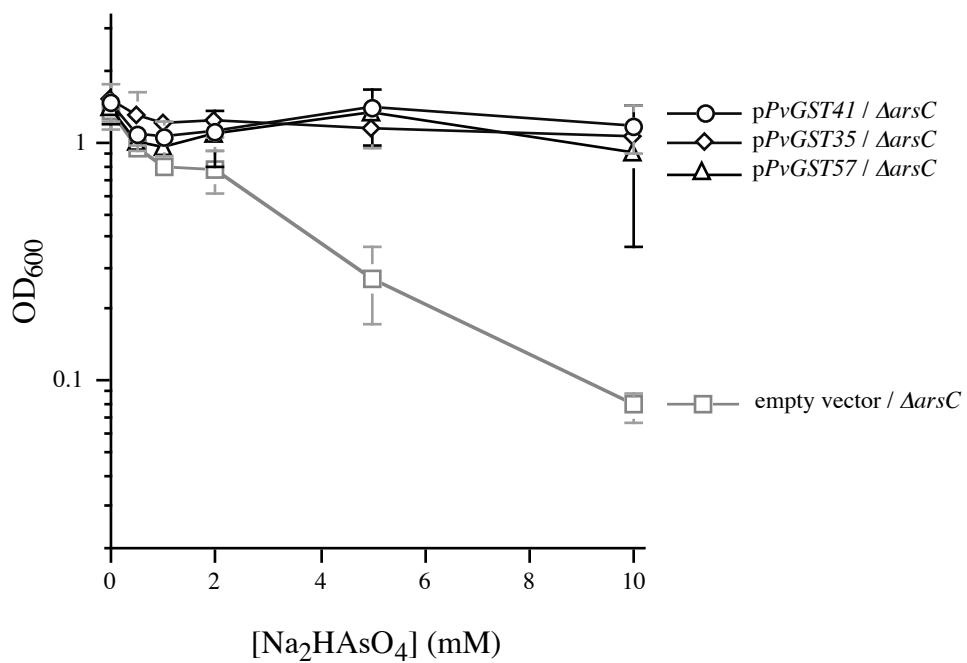

**Figure 2.**

### Figure 3

```
pPvGSH57 -----g\  
pPvGST35/57                gcgggccaatagagt-agactct---gagagag  
pPvGST35                -----gacat/  
pPvGST41                ggacgtgcagaaacacaagcgcgcgcgcacgcacacgcacacgcacgcaactcacactgtagcgagagag
```

PvGST1  
pPvGST35/57 **agagagagagagatgacgatcacagtgacggggcaggcaacctccagctgcacctcacgcgtgcttacc**  
pPvGST41 **agagagagagagatgacgatcacagtagcggggcaggcaacctccagctgcacctaacgcgtgcttacc**  
PvGST2 M T I T V H G Q A T S S C T S R V L T

PvGST1 T L F E K D V S D F Q L L H V D L S T G A H K  
pPvGST35/57 **acctcttcgagaaggacgtctctgatttccagcttctgcacgtcgatctctccaccggcgccacaag**  
pPvGST41 **acctcttcgagaaggacgtctctgatttccagcttctgcacgtcgatctctctactggcgctcacaag**  
PvGST2 T L F E K D V S D F Q L L H V D L S T G A H K

PvGST1 Q P D Y L A L Q P F G V I P V V Q D G D L T I  
pPvGST35/57 **cagccgactacctcgcctccagccttttggcgtcataaccagttgttcaagatggagaccttaccatc**  
pPvGST41 **cagcctgaatctcgcctcgcagccttttggcgtcataaccagtcggttcaagatggggaccttaccatc**  
PvGST2 Q P E Y L A L Q P F G V I P V V Q D G D L T I

PvGST1 F E S R A I I R Y L A L K Y E D Q G S P L Y G  
pPvGST35/57 **ttcgaatcaagagctataataagatacttgctctcaagtatgaggaccaaggtagccccattgtatggg**  
pPvGST41 **ttcgaatcaagagctataataagatacttgctctcaaatatgaggaccaaggaagccccattgtatggg**  
PvGST2 F E S R A I I R Y L A L K Y E D Q G S P L Y G

PvGST1 R T L E E R A L V E Q W L E V E S Q N F H V A  
pPvGST35/57 **agaacattagaggaaaggctctagtggagcagtggtcagaagtggatcacaaccttccacgtggca**  
pPvGST41 **agaacattagaggaaaggctaatgtggagcaatggttgaagttagctgcagaatttccacgtggca**  
PvGST2 R T L E E R A N V E Q W L E V E S Q N F H V A

PvGST1 A S A L V Y Q L S S R A K K G L P P D A D V V  
pPvGST35/57 **gcatcagcattagtctaccagctatcatcacgagctaaaaaggattgcctcctgatgcagatgtgggtt**  
pPvGST41 **gcatcggcaatcgtcaaccaactatcatctcgtgcaaaaaagggtccccctgaagagggtgtgggtt**  
PvGST2 A S A I V N Q L S S R A K K G L P P E E G V V

PvGST1 K A N I E K L E A T L D I Y E K R L S K S S F  
pPvGST35/57 **aaggcaaacattgaaaagcttgaagccaaccttagatataatagagaagcgttgtcaaaagctccttc**  
pPvGST41 **aagcaaacattgaaaagcttgaaggccaaccttagatgtgtatgagaagcgttgtcaggagctccttc**  
PvGST2 K T N M E K L E A I L D V Y E K R L S E S S F

PvGST1 L A G D F F S L A D L S H L P R T K S L M K S  
pPvGST35/57 **ttagcaggggatttctttagcttggcagacctctccacctcctcgcacaaagtcgctcatgaagtctt**  
pPvGST41 **ttagcaggagacttctttagcttggctgacctctccacctcctcgtaccaagtccttgtaaggtctt**  
PvGST2 L A G D F F S L A D L S H L P R T K S L V K S

PvGST1 A N L T H L I T A R E H V H A W W Q R I S T R  
pPvGST35/57 **gccaacctgactcacctaattaccgctcgcgagcatgtccatgcatgggtggcaacgtatctccactcgc**  
pPvGST41 **tgcaaatctcctcaccttattacctctcgcgaagcagtcctatgaatgggtggcaacgcatctctactcgt**  
PvGST2 C K L P H L I T S R K H V H E W W Q R I S T R

PvGST1 P S W V K V T E M A T P S K X  
pPvGST35/57 **ccttcattgggttaagggtcagaaatggctactccttcaaatgatttgagacctcatgttgagtgaaa**  
pPvGST41 **ccttcattggatcaagggtcattgaaatggctgcccttcaaatgatgtaagacctcactt-gcaaaa**  
PvGST2 P S W I K V I E M A A P S K X

pPvGSH57 /tc\ /tgtc\ /tgg\ /ggtgtttgtagttt  
pPvGST35/57 cattatagaataataaaagaattatcagtc aaaa a aaa  
pPvGSH35 \aa/ \aaaa/ \aaa/ \aaaaaaaaaaaa  
pPvGST41 catgggtggcata-cacaactcctcaaaagtc gc aaaa aaaa a aaa aaa aaaaaaaaaaaaaa

pPvGSH57 tttttttttaataaccagaacagggcagatgaattgtat

```

PvGST1      -----MTITVHGQAT[S]SCT[S]R[V]LTTLFEKDVSDFQLLHVDLSTGAHKQ-----PDYLALQPFQ-V
PvGST2      -----MTITVHGQAT[S]SCT[R]VLTTLFEKDVSDFQLLHVDLSTGAHKQ-----PEYLALQPFQ-V
V. vinifera
G. max      -----MVKVYG-PDFAS[AKR]V[V]LCLIEKEV-EFETLPIDIIKQONK-----PEFLKLQPFQ-V
C. sinensis
P. hybrida
AtGSTF2     -----MAGIKVFGHPA[S]IATR[R]V[L]IALHEKNL-DFELVHVELKDGEHKK-----EPFLSRNPFQ-Q
AtGSTT1     -----MMKLKVIYADRM[S]Q-PSR[AV]IIFCKVNGIQFDEVLISLAKRQQLS-----PEFKDINPLG-K
AtGSTZ1     -----MANSGEKELKLYSYWR[S]SCAHR[V]RIALALKGL-DYEYIPVNLKGDQFDSVYRFDLQDFKKNIPMG-T
AtGSTU5     -----MAEKEEVKLLGIWAS[PF]SR[R]VEMALKLKI-PYEVVEEILENKS-----PLLLALNPIHKK
                .         . * . :         :: :         :         :* :

PvGST1      IPVVQDGDLTIFE[S]RAIIRYLALKYEDQGSPLYG---RTLLEERALVEQWLEV ESQNFHVAASALVYQL
PvGST2      IPVVQDGDLTIFE[S]RAIIRYLALKYEDQGSPLYG---RTLLEERANVEQWLEV ESQNFHVAASAIVNQL
V. vinifera
G. max      LPVIQDGDYTLFE[S]RAIIRYLAEKYKQGTDLLG---KTIEERGVEQWLEV EAQSYHPAIDNLVIEI
C. sinensis
P. hybrida
AtGSTF2     VPVIEDGDFKLFES[RAIIR]YAAKYANQGNLLG---NTLEEKALVDQWLEV EAHNFNDLAFNLVLQL
AtGSTT1     VPVIEDGDFRLE[S]RAIIR]YAAKYEVKGSKLTG---TTLEEKALVDQWLEV ESNNYNDLVYNMVQL
AtGSTZ1     VPAFEDGDLKLFES[RAITQ]YIAHRYENQGTNLLQTDKNI SQYAIMAIGMQV EDHQFDPVASKLAFEQ
AtGSTU5     VPAIVDGRLLKLFES[HA]ILY[L]SSAFPVSADHWYP---NDLSKRAKIHVSLDW HHTNLRGAAGYVLS
                VPALVDGDDVIND[S]FAIMYLDEKYPE--PPLLP---RDLHKRAVNYQAMSI VLSGIQPHONLAVIRY
                VPVLVHNGKTILE[S]HVILEYIDETWPQ---NPILP---QDPYERSKARFFAKL VDEQIMNVGFISMARA
                :*.. .. : :* . * * :         : . . .

PvGST1      SSRAKKGLPPDADVVKANIEKLEATLDIYEKRLSKS---SFLAGDFFSLADLSHLPRTKSLMKSAN--
PvGST2      SSRAKKGLPPEEGVVKTNMEKLEAILDVYEKRLSES---SFLAGDFFSLADLSHLPRTKSLVKSCK--
V. vinifera
G. max      LFGRKRGIPPDAKVI ESEKKLAKVLDIYEERLSKS---KYLAGEFFSLADLSHLPFTKYLADMG---
C. sinensis
P. hybrida
AtGSTF2     LFPALTGAPSDQKVI EESDKKIEKVLVDVYEERLSKS---KYLAGEFFSLADLSHLPFGHYLVNQTG--
AtGSTT1     VILPRMGQRSDTALVHNLEQKLEAVLNIYEQRLSKS---NYLAGDSFTLADLSHLPALRYLMNEAG--
AtGSTZ1     LVFPKMGQTSDLTLVT[K]CANKLENVFDIYEQRLSKS---KYLAGEFFSLADLSHLP SLRFLMNEGG--
AtGSTU5     IFKSIYGLTTDEAVVAEEEA KLA KVLVDVYEARLKEF---KYLAGEFTTLTDLHHPAIQYLLGTP---
                VLGPALGLPLNPKAAAEAEQLLTKSLSTLETFWLKGNAKFLLSGNQPSIADLSLVCELMQLQVLDLDDK
                IEKINVEEKTAWVNNAITKGF[T]ALEKLLVNCAGKH----ATGDEIYLADLFLAPQIHGAINRFQIN
                DEKGREVLAEQVRELIMYLEKELVKGKTVGGKTVGFLDFVAGSLIPFCLERGWEGIGLEVITEEFKPE
                .
                :

PvGST1      LTHLITAREHVHAWWQ--RISTRPSWVKVTEMATPSK-----
PvGST2      LPHLITSRKHVHEWWQ--RISTRPSWIKVIEAAPS-----
V. vinifera
G. max      KMYLIEERKHVKAWWD--DISNRPSWKKVFSRWPLLE-----
C. sinensis
P. hybrida
AtGSTF2     RGNLVRDRKHVSAWWD--DISNRPAWQKVLQLYKYPV-----
AtGSTT1     MAHLVTQRKHVNAWWD--KISSRPWKKLASLAH-----
AtGSTZ1     FSHLVTKRKCLHEWYL--DISSRDSWKKVLDLMMKKISEIEAVSIPAKEEAKV-----
AtGSTU5     TKKLFTERPRVNEWVA--EITKRPASEKVQ-----
                RLRLLSSTHKKVEQWIENTKKATMPHFDETHEILFKVKEGFQKRREMGTL SKPGLQSKI
                MEPYPTLAKCYESYNELPAFQNALPEKQPDAPSSTI-----
                FKRWRNLEKVEIVKDCVPPREEHVEHMNYMAERVRSS-----
    
```

Figure 4A.

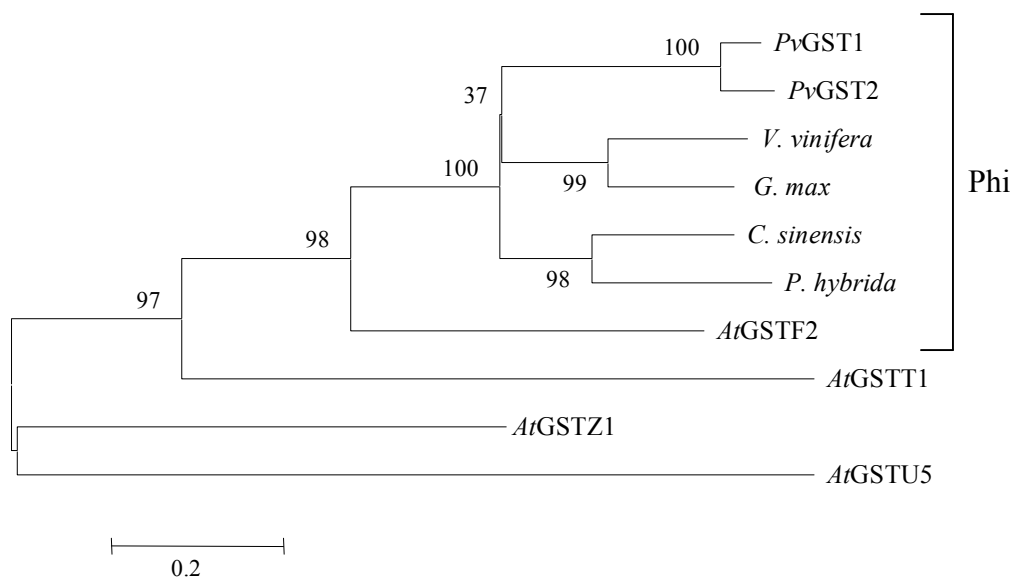

**Figure 4 B.**

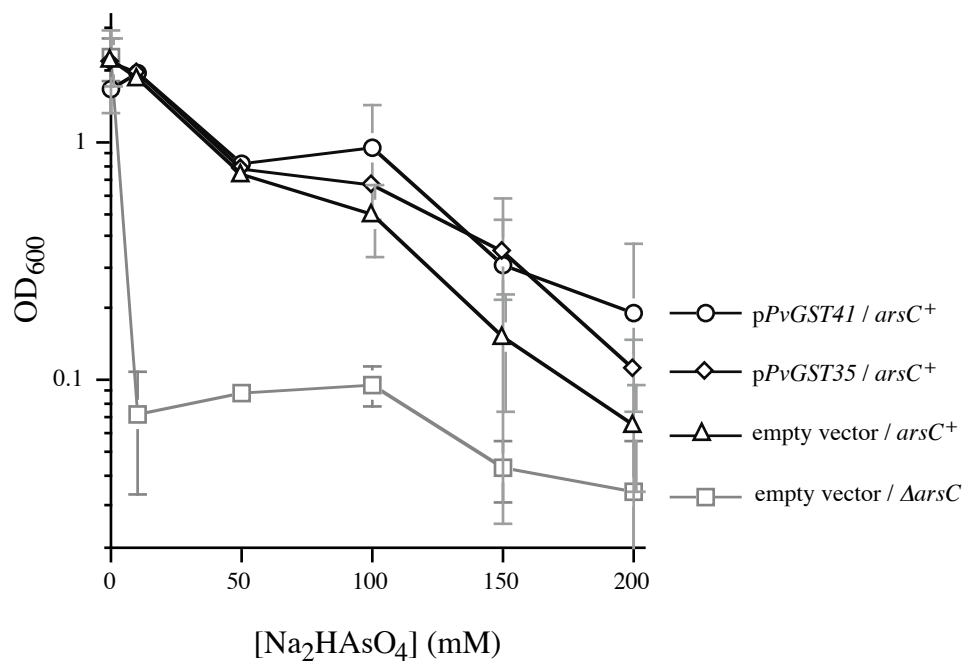

**Figure 5.**

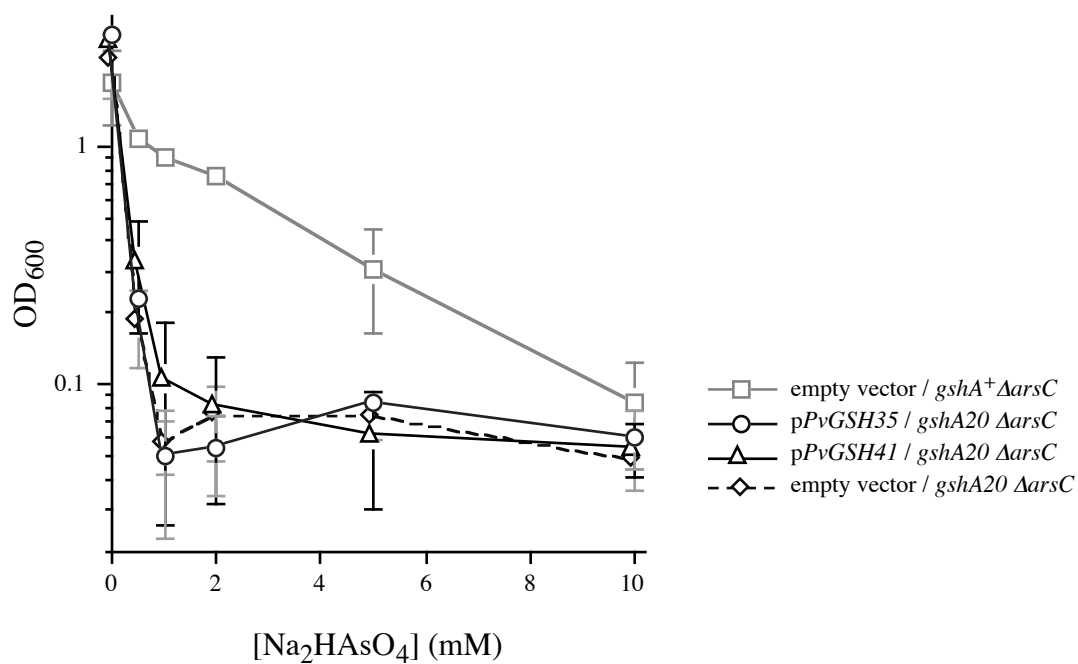

**Figure 6A.**



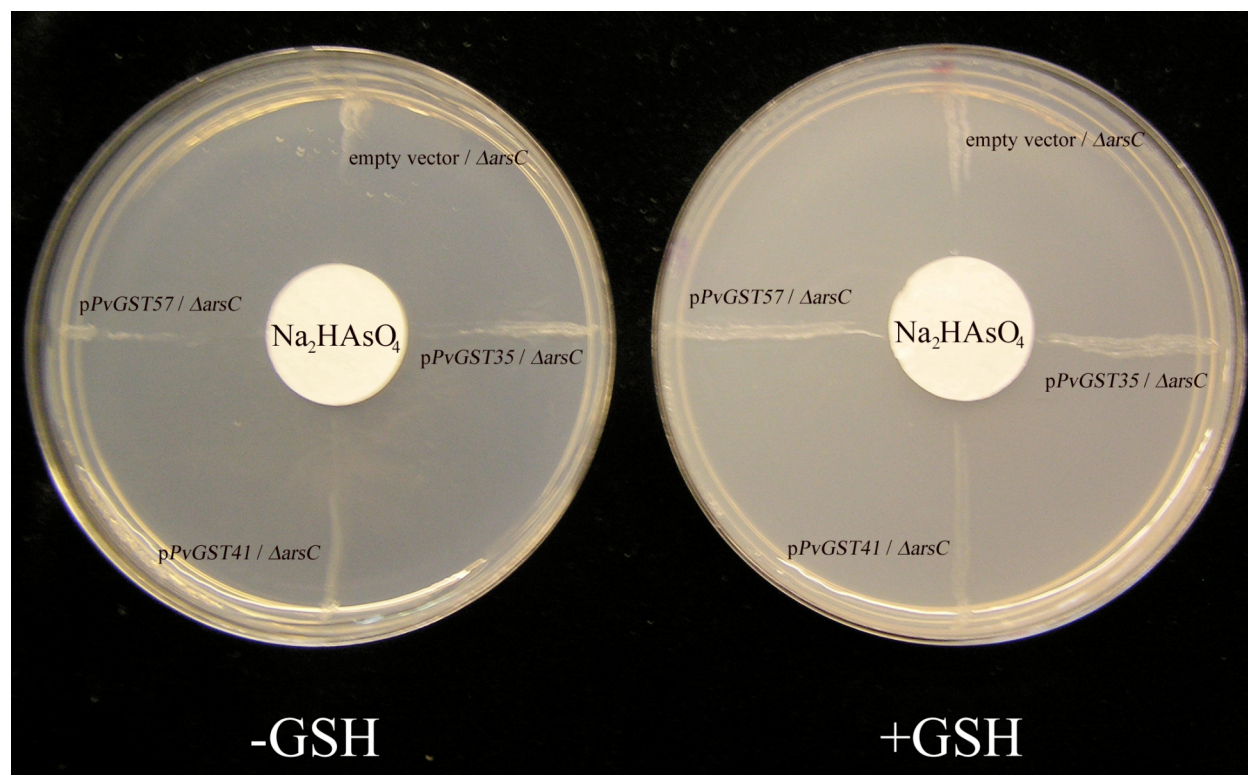

**Figure 6B.**

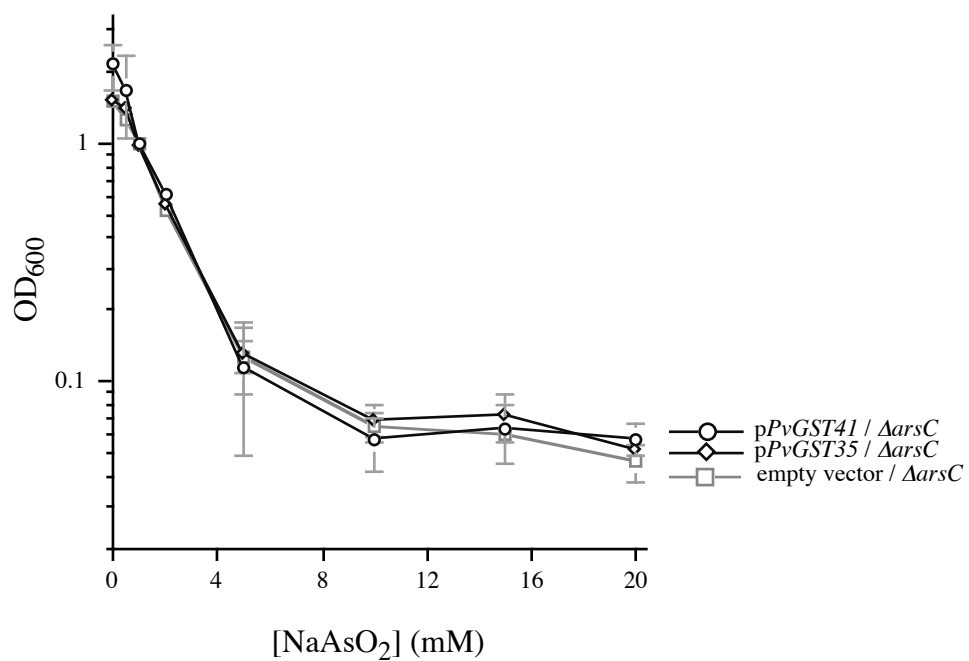

**Figure 7.**

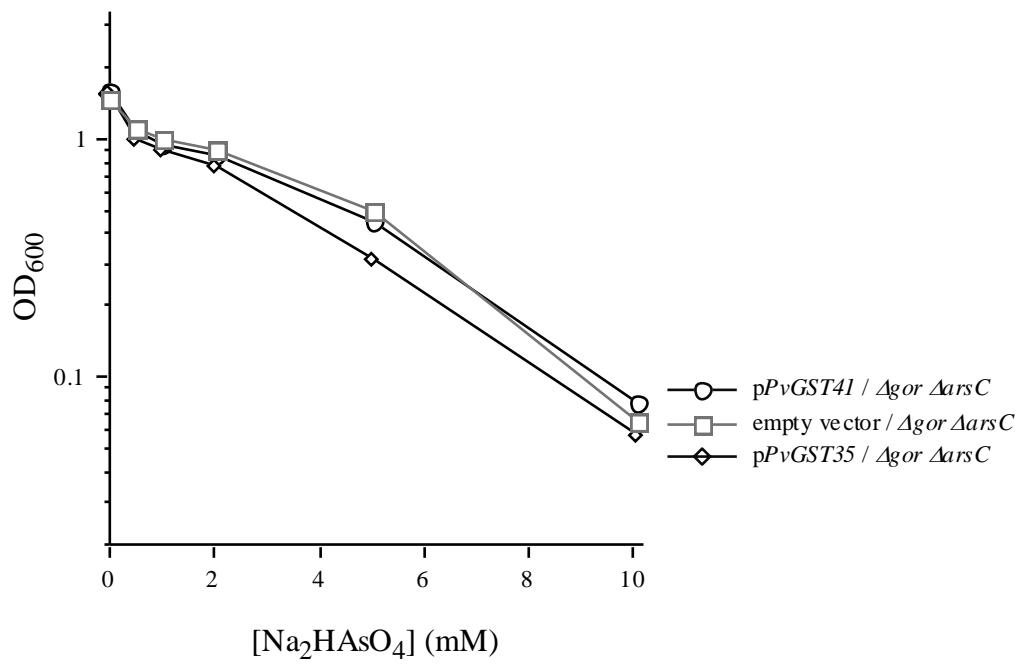

**Figure 8.**
